# Supplementary material for: MiR-367 regulates cell proliferation and metastasis by targeting metastasis-associated protein 3 (MTA3) in clear-cell renal cell carcinoma
Source: PubMed Central journal article supplement (PMC5609905; doi:10.18632/oncotarget.18647), 2017-06-27
Supplement: oncotarget-08-63084-s001.pdf [file oncotarget-08-63084-s001.pdf]

## MiR-367 regulates cell proliferation and metastasis by targeting metastasis-associated protein 3 (MTA3) in clear-cell renal cell carcinoma

### SUPPLEMENTARY FIGURES

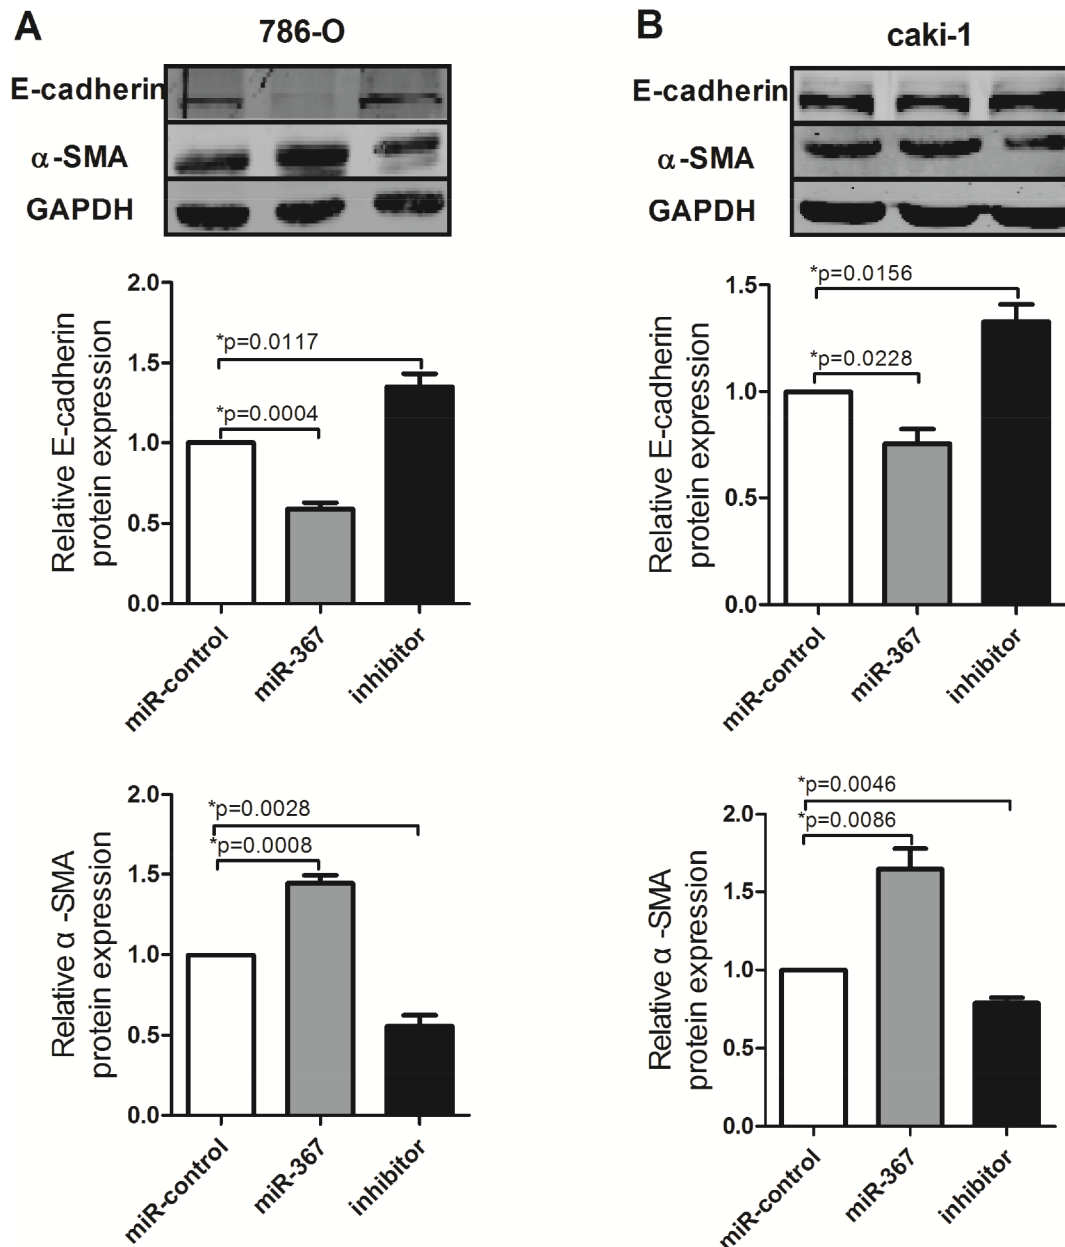

**Supplementary Figure 1: EndMT in ccRCC cells is mediated by miR-367.** (A and B) Western-blot was performed to show protein levels of E-cadherin and  $\alpha$ -SMA in Caki-1 and 786-O cells. Data are expressed as mean  $\pm$  SEM; \*\* $p$ <0.01 or \* $p$ <0.05 vs. miR-control.

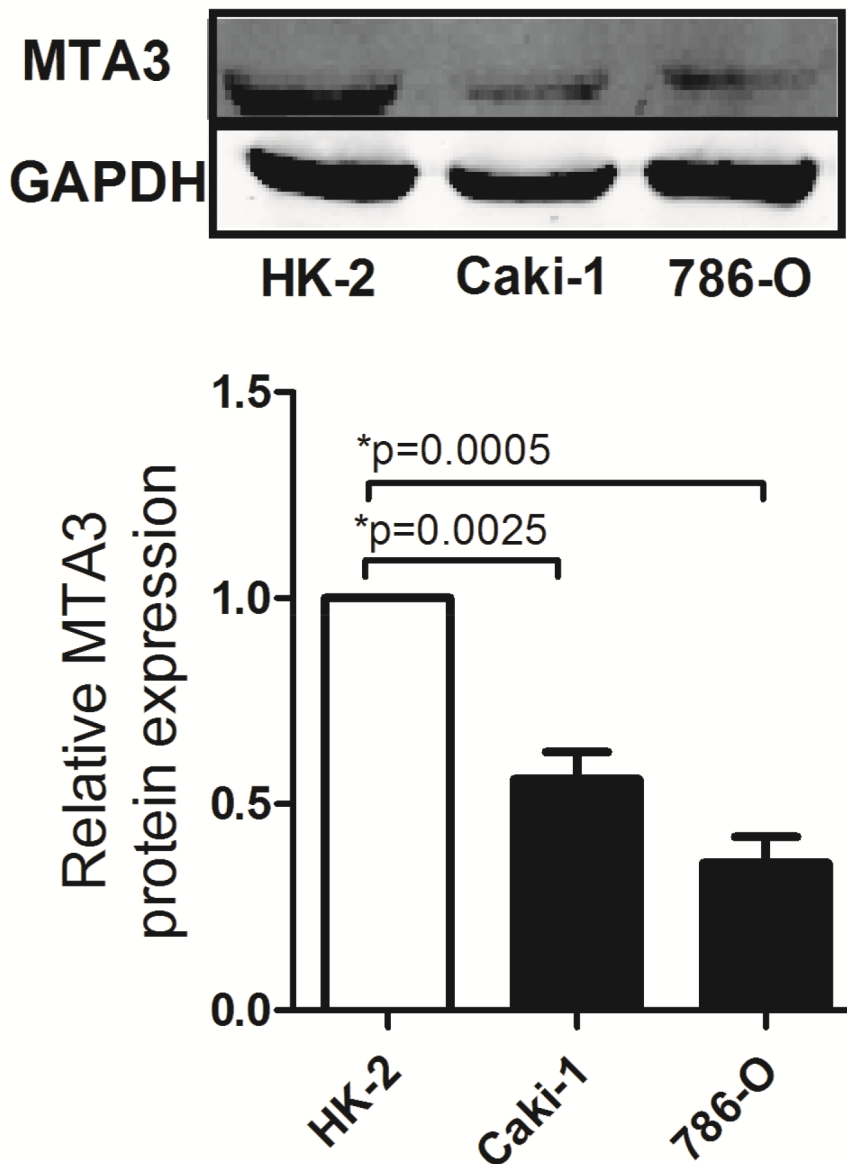

**Supplementary Figure 2: Expression of MTA3 in ccRCC cells and human renal proximal tubular cells.** MTA3 protein level of ccRCC cells (786-O and Caki-1) and human renal proximal tubular cells (HK-2) were assessed by western blot. Data are expressed as mean ± SEM; \*\* $p < 0.01$  vs. HK-2.

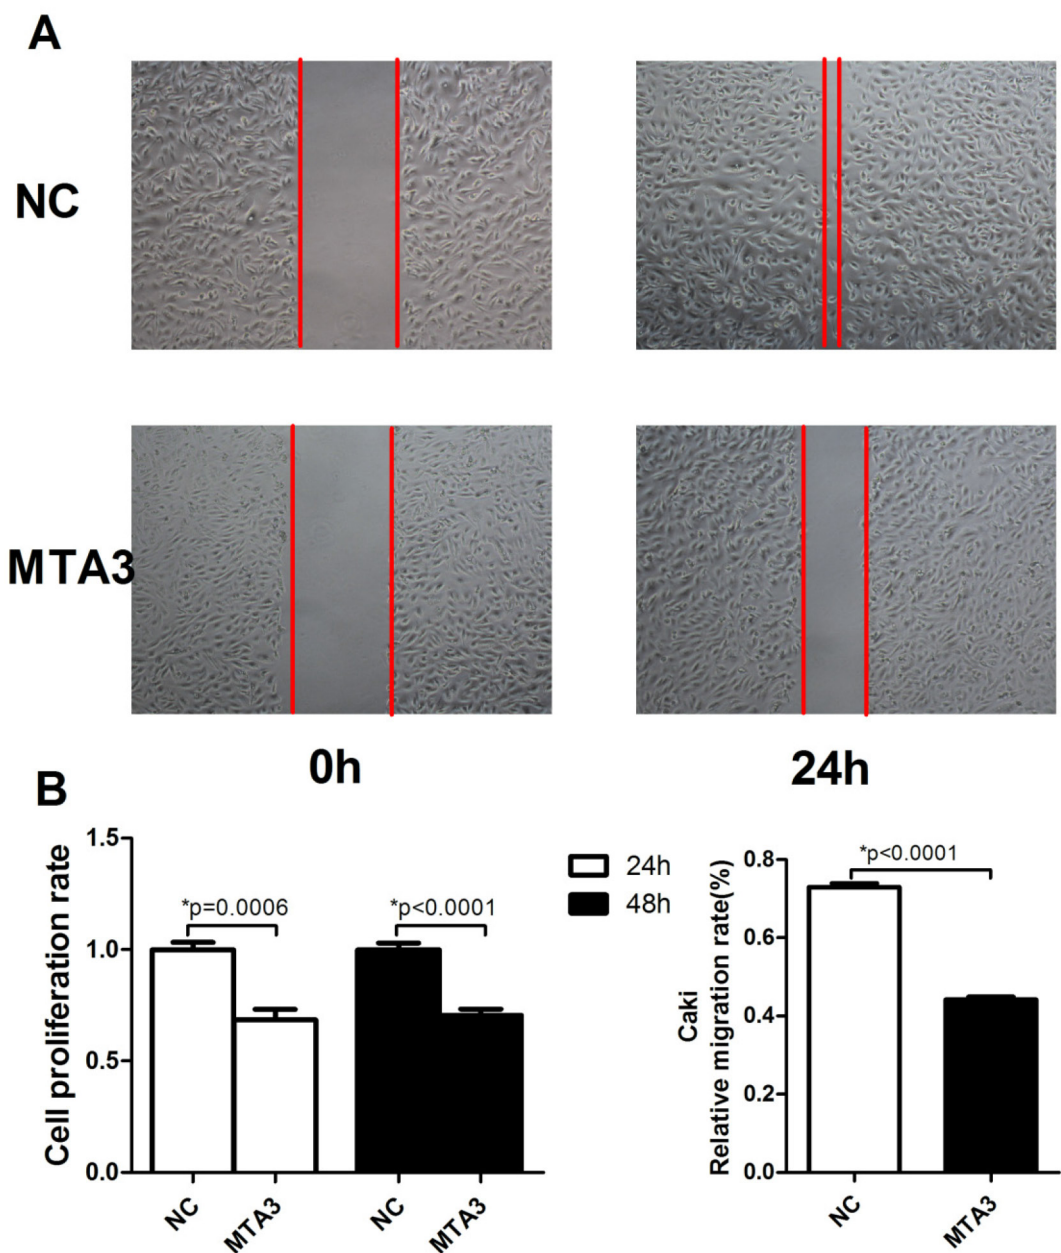

**Supplementary Figure 3: MTA3 suppresses caki-1 cell proliferation and metastasis.** (A) Wound healing assay to confirm migration ability of Caki-1 cell lines after transfected with MTA3 plasmid. (B) Caki-1 cell viability was detected by MTT assay after transfected with MTA3 plasmid for 24 h and 48 h. Data are expressed as mean ± SEM; \*\*p<0.01 vs. miR-control.
